# Supplementary material for: From AgTeO2F and Ag2(TeO2F2) to Ag3F3(TeF6)(TeO2)12: the first silver tellurite oxyfluorides with linear and nonlinear optical properties
Source: Royal Society of Chemistry journal article supplement (doi:10.1039/d2qi02272a), 2023-01-01
Supplement: d2qi02272a1.pdf [file d2qi02272a1.pdf]

# **From $\text{AgTeO}_2\text{F}$ , $\text{Ag}_2(\text{TeO}_2\text{F}_2)$ to $\text{Ag}_3\text{F}_3(\text{TeF}_6)(\text{TeO}_2)_{12}$ : First Silver Tellurite Oxyfluorides with Linear and Nonlinear Optical Property**

Bo Zhang,<sup>a,b</sup> Jia-Hang Wu,<sup>a,b</sup> Chun-Li Hu,<sup>a</sup> Ya-Feng Li,<sup>b</sup> Fang Kong,<sup>\*a,c</sup> and Jiang-Gao Mao<sup>\*a,c</sup>

<sup>a</sup> State Key Laboratory of Structural Chemistry, Fujian Institute of Research on the Structure of Matter, Chinese Academy of Sciences, Fuzhou 350002, P. R. China.

<sup>b</sup> College of Chemistry, Fuzhou University, Fuzhou 350108, P. R. China.

<sup>c</sup> University of Chinese Academy of Sciences, Beijing 100049, P. R. China.

\*Corresponding Authors: [kongfang@fjirsm.ac.cn](mailto:kongfang@fjirsm.ac.cn), [mjg@fjirsm.ac.cn](mailto:mjg@fjirsm.ac.cn)

## Table of Contents

| Section          | Caption                                                                                                                                                                                                                                                                                                | Page           |
|------------------|--------------------------------------------------------------------------------------------------------------------------------------------------------------------------------------------------------------------------------------------------------------------------------------------------------|----------------|
| <b>Figure S1</b> | As-grown small crystals of AgTeO <sub>2</sub> F (a), Ag <sub>2</sub> (TeO <sub>2</sub> F <sub>2</sub> ) (b) and Ag <sub>3</sub> F <sub>3</sub> (TeF <sub>6</sub> )(TeO <sub>2</sub> ) <sub>12</sub> (c).                                                                                               | <b>S3</b>      |
| <b>Figure S2</b> | Simulated and experimental XRD powder patterns of AgTeO <sub>2</sub> F (a), Ag <sub>2</sub> (TeO <sub>2</sub> F <sub>2</sub> ) (b) and Ag <sub>3</sub> F <sub>3</sub> (TeF <sub>6</sub> )(TeO <sub>2</sub> ) <sub>12</sub> (c).                                                                        | <b>S4-S5</b>   |
| <b>Figure S3</b> | Te(1)O <sub>2</sub> F <sub>2</sub> group (a), Te(2)O <sub>2</sub> F <sub>2</sub> unit (b), the 2D Ag-O-F layers in the ab plane (c) and the 3D silver oxyfluoride open framework of Ag <sub>2</sub> (TeO <sub>2</sub> F <sub>2</sub> ) (d).                                                            | <b>S6</b>      |
| <b>Figure S4</b> | Te(2)F <sub>6</sub> octahedron (a), AgO <sub>8</sub> polyhedron (b) and the 3D cationic framework of [Ag <sub>3</sub> (TeO <sub>2</sub> ) <sub>12</sub> ] <sup>3+</sup> (c) in Ag <sub>3</sub> F <sub>3</sub> (TeF <sub>6</sub> )(TeO <sub>2</sub> ) <sub>12</sub> .                                   | <b>S7</b>      |
| <b>Figure S5</b> | Simulated and experimental PXRD patterns of AgTeO <sub>2</sub> F (a) Ag <sub>2</sub> (TeO <sub>2</sub> F <sub>2</sub> ) (b) at different temperatures.                                                                                                                                                 | <b>S8</b>      |
| <b>Figure S6</b> | Infrared spectrum of AgTeO <sub>2</sub> F (a), Ag <sub>2</sub> (TeO <sub>2</sub> F <sub>2</sub> ) (b) and Ag <sub>3</sub> F <sub>3</sub> (TeF <sub>6</sub> )(TeO <sub>2</sub> ) <sub>12</sub> (c).                                                                                                     | <b>S9-S10</b>  |
| <b>Table S1</b>  | Atomic coordinates ( $\times 10^4$ ) and equivalent isotropic displacement parameters ( $\text{\AA}^2 \times 10^3$ ) for AgTeO <sub>2</sub> F (a), Ag <sub>2</sub> (TeO <sub>2</sub> F <sub>2</sub> ) (b) and Ag <sub>3</sub> F <sub>3</sub> (TeF <sub>6</sub> )(TeO <sub>2</sub> ) <sub>12</sub> (c). | <b>S11</b>     |
| <b>Table S2</b>  | The bond lengths ( $\text{\AA}$ ) and calculated bond valences for AgTeO <sub>2</sub> F (a), Ag <sub>2</sub> (TeO <sub>2</sub> F <sub>2</sub> ) (b) and Ag <sub>3</sub> F <sub>3</sub> (TeF <sub>6</sub> )(TeO <sub>2</sub> ) <sub>12</sub> (c).                                                       | <b>S12-S13</b> |
| <b>Table S3</b>  | The bond angles (deg.) for AgTeO <sub>2</sub> F (a), Ag <sub>2</sub> (TeO <sub>2</sub> F <sub>2</sub> ) (b) and Ag <sub>3</sub> F <sub>3</sub> (TeF <sub>6</sub> )(TeO <sub>2</sub> ) <sub>12</sub> (c).                                                                                               | <b>S14-S15</b> |
| <b>Table S4</b>  | State energies (eV) of the highest valence band (H-VB) and the lowest conduction band (H-CB) of AgTeO <sub>2</sub> F and Ag <sub>2</sub> (TeO <sub>2</sub> F <sub>2</sub> ).                                                                                                                           | <b>S16</b>     |
| <b>S1</b>        | Computational Methods.                                                                                                                                                                                                                                                                                 | <b>S17</b>     |

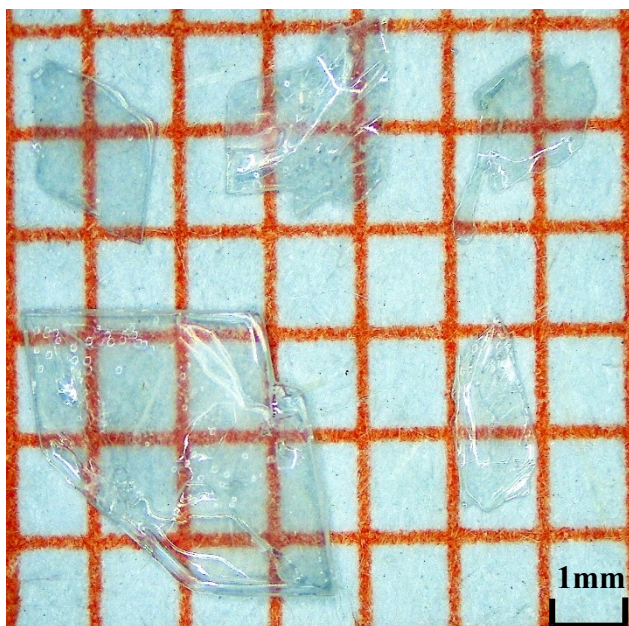

(a)

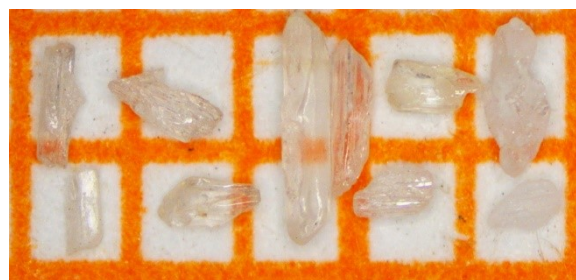

(b)

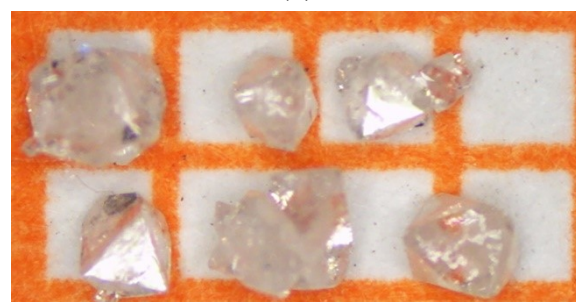

(c)

**Figure S1.** As-grown small crystals of  $\text{AgTeO}_2\text{F}$  (a),  $\text{Ag}_2(\text{TeO}_2\text{F}_2)$  (b) and  $\text{Ag}_3\text{F}_3(\text{TeF}_6)(\text{TeO}_2)_{12}$  (c)

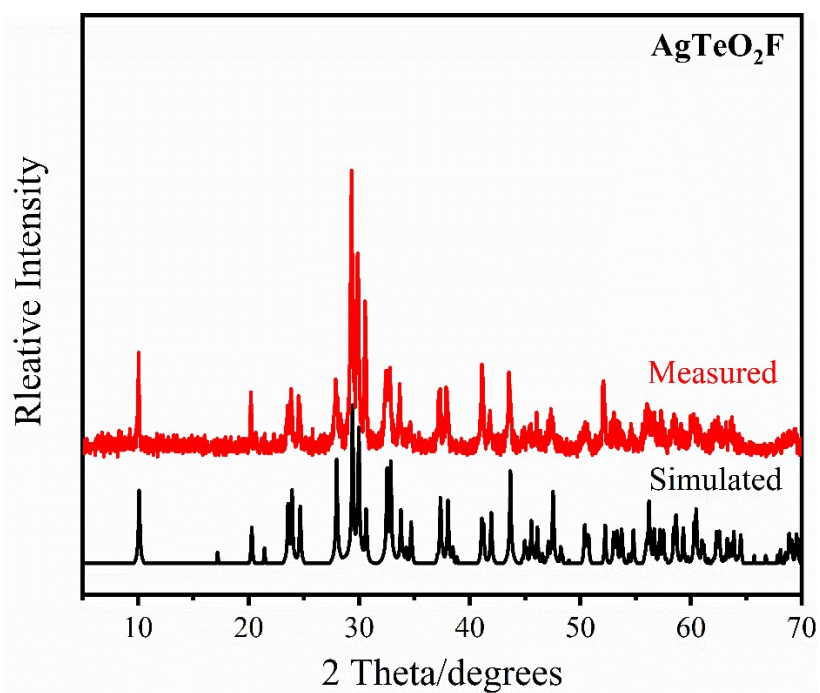

(a)

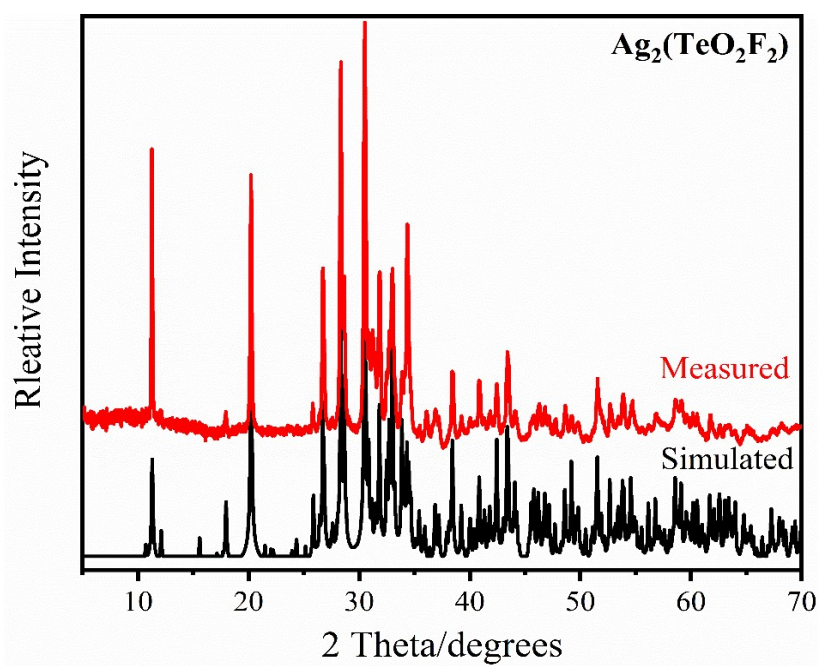

(b)

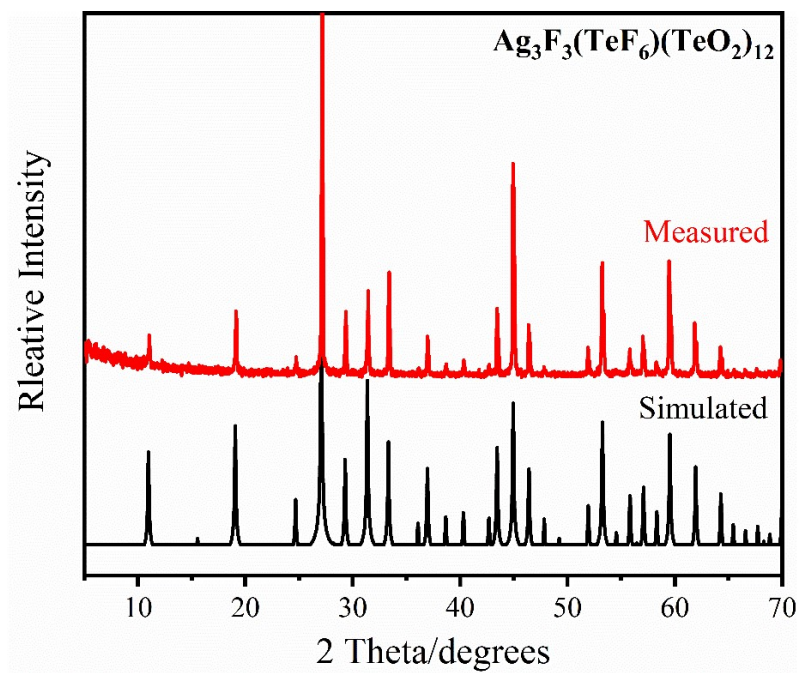

(c)

**Figure S2.** Simulated and experimental XRD powder patterns of  $\text{AgTeO}_2\text{F}$  (a),  $\text{Ag}_2(\text{TeO}_2\text{F}_2)$  (b) and  $\text{Ag}_3\text{F}_3(\text{TeF}_6)(\text{TeO}_2)_{12}$  (c).

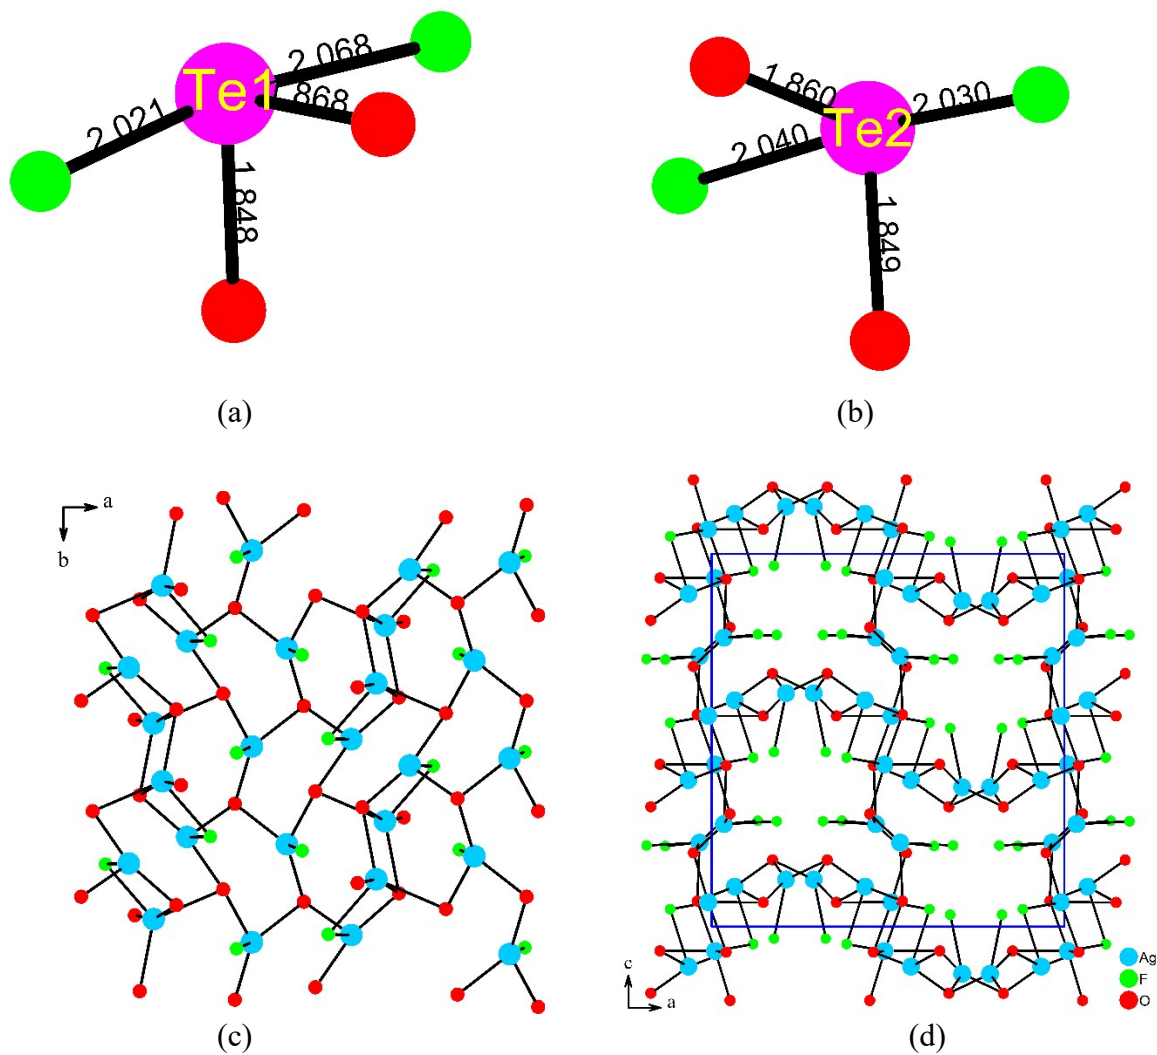

**Figure S3.** Te(1)O<sub>2</sub>F<sub>2</sub> group (a), Te(2)O<sub>2</sub>F<sub>2</sub> unit (b), the 2D Ag-O-F layer in the ab plane (c) and the 3D silver oxyfluoride open framework of Ag<sub>2</sub>(TeO<sub>2</sub>F<sub>2</sub>) (d)

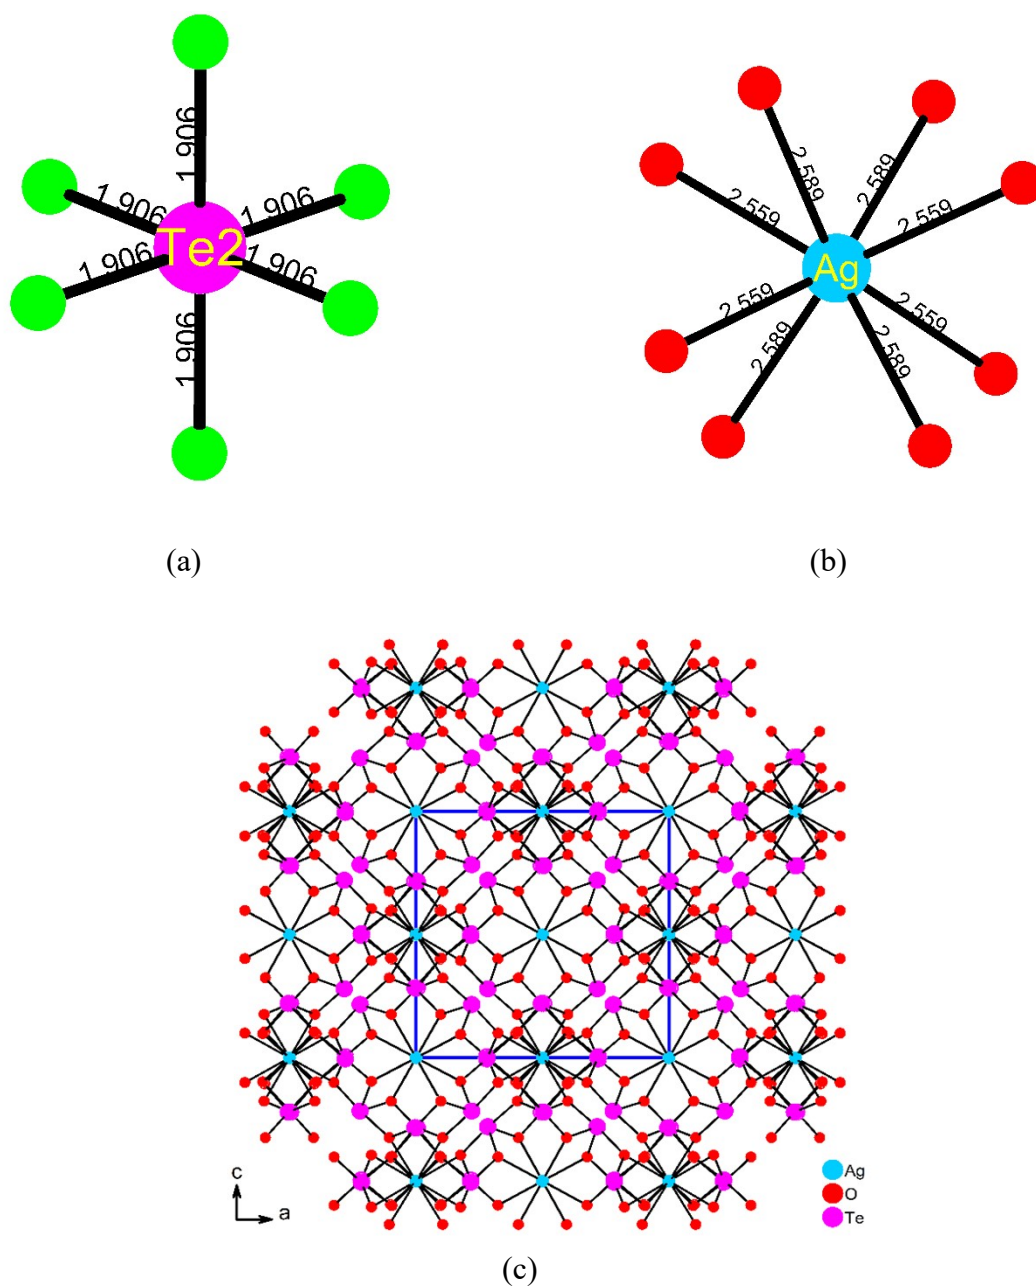

**Figure S4.** Te(2)F<sub>6</sub> octahedron (a), AgO<sub>8</sub> polyhedron (b) and the 3D cationic framework of [Ag<sub>3</sub>(TeO<sub>2</sub>)<sub>12</sub>]<sup>3+</sup> (c) in Ag<sub>3</sub>F<sub>3</sub>(TeF<sub>6</sub>)(TeO<sub>2</sub>)<sub>12</sub>

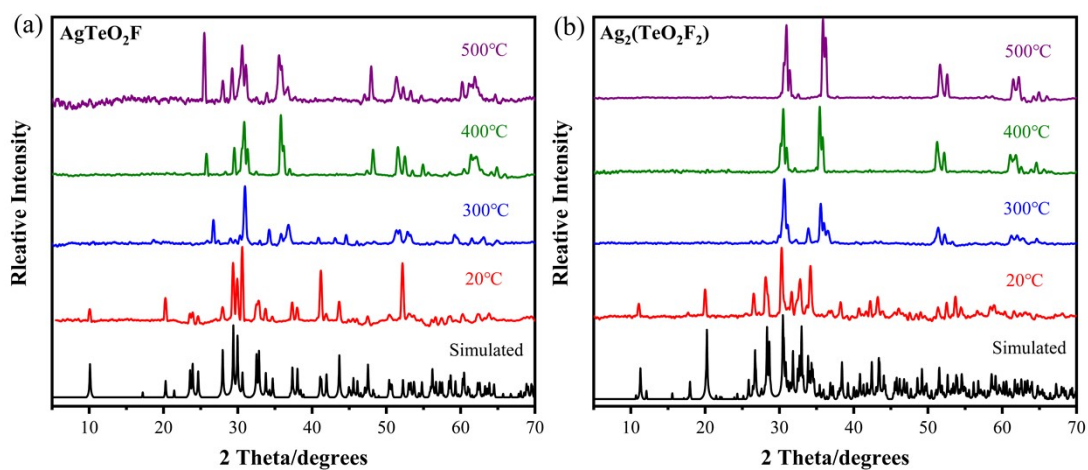

**Figure S5.** Simulated and experimental PXRD patterns of  $\text{AgTeO}_2\text{F}$  (a),  $\text{Ag}_2(\text{TeO}_2\text{F}_2)$  (b) at different temperatures.



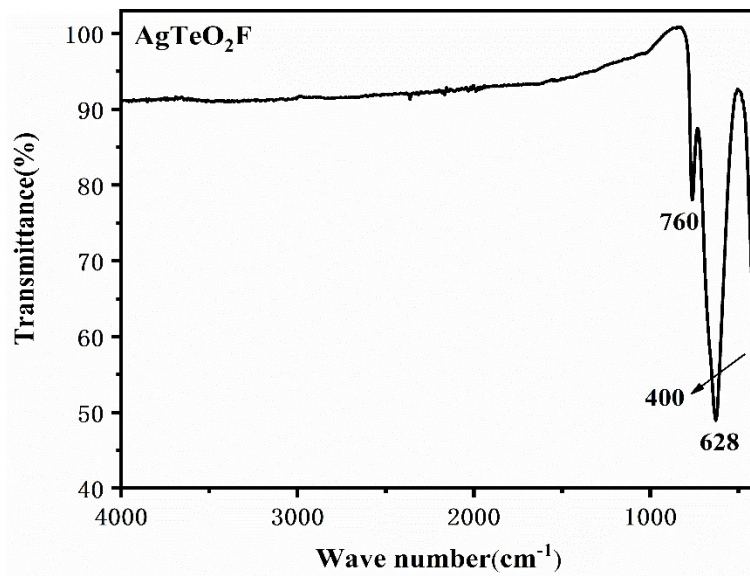

(a)

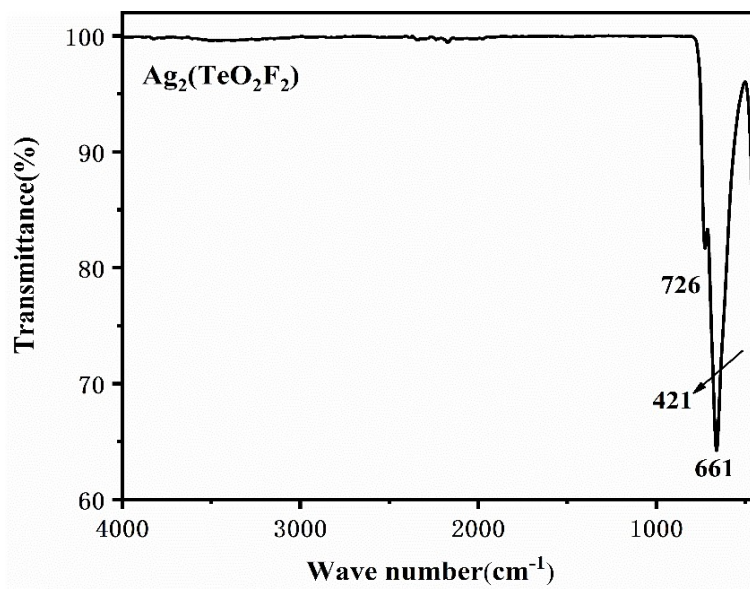

(b)

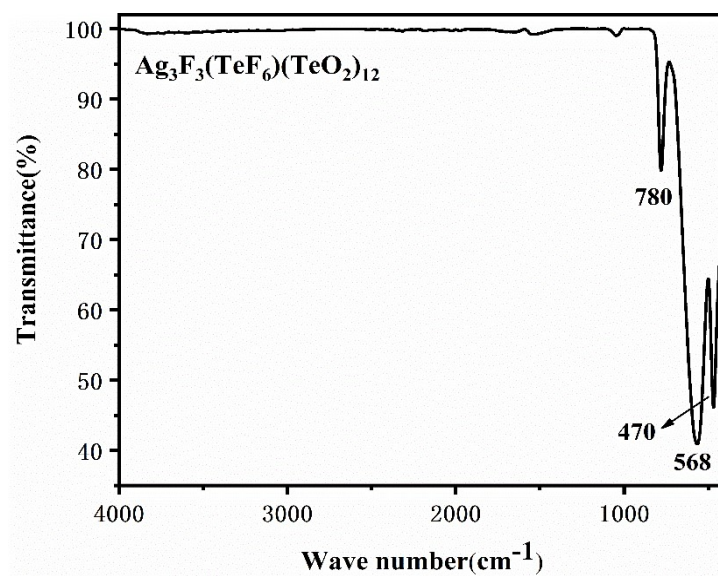

(c)

**Figure S6.** Infrared spectrum of  $\text{AgTeO}_2\text{F}$  (a),  $\text{Ag}_2(\text{TeO}_2\text{F}_2)$  (b) and  $\text{Ag}_3\text{F}_3(\text{TeF}_6)(\text{TeO}_2)_{12}$  (c)

**Table S1.** Atomic coordinates ( $\times 10^4$ ) and equivalent isotropic displacement parameters ( $\text{\AA}^2 \times 10^3$ ) for  $\text{AgTeO}_2\text{F}$ ,  $\text{Ag}_2(\text{TeO}_2\text{F}_2)$  and  $\text{Ag}_3\text{F}_3(\text{TeF}_6)(\text{TeO}_2)_{12}$ .  $U_{\text{eq}}$  is defined as 1/3 of the trace of the orthogonalised  $U_{ij}$  tensor.

|                                                                                   | <b>Atom</b> | <b>x</b>   | <b>y</b>   | <b>z</b>   | <b>U(eq)</b> |
|-----------------------------------------------------------------------------------|-------------|------------|------------|------------|--------------|
| <b>AgTeO<sub>2</sub>F</b>                                                         | Ag(1)       | 5883.1(7)  | 9397.7(8)  | 2239.9(10) | 24.3(2)      |
|                                                                                   | F(1)        | 8930(5)    | 6729(5)    | 4845(7)    | 26.7(9)      |
|                                                                                   | O(1)        | 6435(5)    | 5872(6)    | 1709(8)    | 17.4(10)     |
|                                                                                   | Te(1)       | 8239.0(5)  | 4510.4(6)  | 2389.4(7)  | 12.84(19)    |
|                                                                                   | O(2)        | 7433(6)    | 3004(6)    | 5032(8)    | 22.6(11)     |
| <b>Ag<sub>2</sub>(TeO<sub>2</sub>F<sub>2</sub>)</b>                               | Ag(1)       | 2893.2(8)  | 4695.3(13) | 1261.7(5)  | 45.7(3)      |
|                                                                                   | F(1)        | 3154(4)    | 10614(9)   | 2824(3)    | 30.8(12)     |
|                                                                                   | O(1)        | 3275(4)    | 7631(10)   | 1787(4)    | 23.6(14)     |
|                                                                                   | Te(1)       | 3334.0(4)  | 7645.5(8)  | 2903.5(3)  | 14.37(17)    |
|                                                                                   | Ag(2)       | 5345.3(6)  | 6638.3(13) | 2252.5(6)  | 39.2(3)      |
|                                                                                   | F(2)        | 3689(4)    | 4828(9)    | 2838(3)    | 31.9(13)     |
|                                                                                   | O(2)        | 4482(4)    | 8325(9)    | 3022(4)    | 21.9(14)     |
|                                                                                   | Te(2)       | 6536.1(4)  | 7131.0(8)  | 5463.9(3)  | 15.99(18)    |
|                                                                                   | Ag(3)       | 4902.0(6)  | 8520.7(13) | 4347.8(5)  | 39.8(3)      |
|                                                                                   | F(3)        | 6765(4)    | 10027(9)   | 5321(4)    | 31.9(14)     |
|                                                                                   | O(3)        | 5410(4)    | 7805(10)   | 5684(4)    | 26.9(16)     |
|                                                                                   | Ag(4)       | 5655.4(6)  | 4327.2(13) | 3927.6(5)  | 35.7(2)      |
|                                                                                   | F(4)        | 6177(4)    | 4298(9)    | 5468(4)    | 37.5(14)     |
|                                                                                   | O(4)        | 6465(5)    | 6999(10)   | 4349(4)    | 28.2(16)     |
| <b>Ag<sub>3</sub>F<sub>3</sub>(TeF<sub>6</sub>)(TeO<sub>2</sub>)<sub>12</sub></b> | Ag(1)       | 0          | -5000      | -10000     | 20.5(4)      |
|                                                                                   | Te(1)       | -2162.9(5) | -5044.5(7) | -7797.3(5) | 13.1(2)      |
|                                                                                   | O(1)        | -1761(6)   | -3946(7)   | -9027(7)   | 18.1(16)     |
|                                                                                   | O(2)        | -959(7)    | -6006(7)   | -8237(6)   | 18.1(16)     |
|                                                                                   | F(1)        | 0          | -8328(15)  | -10000     | 108(5)       |
|                                                                                   | Te(2)       | 0          | -10000     | -10000     | 41.6(7)      |
|                                                                                   | F(2)        | -1836(17)  | -1836(17)  | -8164(17)  | 96(10)       |

**Table S2.** The bond lengths (Å) and calculated bond valences for AgTeO<sub>2</sub>F, Ag<sub>2</sub>TeO<sub>2</sub>F<sub>2</sub> and Ag<sub>3</sub>F<sub>3</sub>(TeF<sub>6</sub>)(TeO<sub>2</sub>)<sub>12</sub>.

| Compound                                                                            | Bond         | Bond-length | Bond-valence | BVS   |
|-------------------------------------------------------------------------------------|--------------|-------------|--------------|-------|
| AgTeO <sub>2</sub> F                                                                | Ag(1)-O(1)   | 2.319(4)    | 0.249        | 0.825 |
|                                                                                     | Ag(1)-O(1)#1 | 2.320(5)    | 0.249        |       |
|                                                                                     | Ag(1)-O(1)#2 | 2.478(5)    | 0.162        |       |
|                                                                                     | Ag(1)-O(2)#3 | 2.472(4)    | 0.165        |       |
|                                                                                     | Te(1)-F(1)   | 2.029(4)    | 0.651        | 4.031 |
|                                                                                     | Te(1)-O(1)   | 1.832(4)    | 1.480        |       |
|                                                                                     | Te(1)-O(2)   | 1.882(4)    | 1.293        |       |
|                                                                                     | Te(1)-O(2)#4 | 2.162(4)    | 0.607        |       |
| Ag <sub>2</sub> (TeO <sub>2</sub> F <sub>2</sub> )                                  | Ag(1)-O(1)   | 2.281(7)    | 0.276        | 0.769 |
|                                                                                     | Ag(1)-O(1)#1 | 2.475(7)    | 0.164        |       |
|                                                                                     | Ag(1)-F(3)#2 | 2.680(6)    | 0.093        |       |
|                                                                                     | Ag(1)-O(4)#2 | 2.340(7)    | 0.236        |       |
|                                                                                     | Ag(2)-O(2)   | 2.190(6)    | 0.353        | 0.961 |
|                                                                                     | Ag(2)-O(2)#2 | 2.342(7)    | 0.234        |       |
|                                                                                     | Ag(2)-O(3)#3 | 2.623(7)    | 0.110        |       |
|                                                                                     | Ag(2)#4-F(1) | 2.458(6)    | 0.169        |       |
|                                                                                     | Ag(2)#4-F(2) | 2.671(7)    | 0.095        | 0.711 |
|                                                                                     | Ag(3)-O(3)#5 | 2.578(7)    | 0.124        |       |
|                                                                                     | Ag(3)-O(3)   | 2.399(7)    | 0.201        |       |
|                                                                                     | Ag(3)-O(2)   | 2.292(6)    | 0.268        |       |
|                                                                                     | Ag(3)-O(4)   | 2.663(8)    | 0.098        | 0.809 |
|                                                                                     | Ag(3)-F(4)#6 | 2.591(7)    | 0.118        |       |
|                                                                                     | Ag(4)#6-O(3) | 2.313(7)    | 0.253        |       |
|                                                                                     | Ag(4)-F(4)   | 2.674(6)    | 0.095        |       |
|                                                                                     | Ag(4)-O(4)   | 2.341(7)    | 0.235        | 4.007 |
|                                                                                     | Ag(4)#4-O(1) | 2.359(7)    | 0.224        |       |
|                                                                                     | Te(1)-F(2)   | 2.021(6)    | 0.665        |       |
|                                                                                     | Te(1)-O(2)   | 1.869(7)    | 1.339        |       |
| Te(1)-F(1)                                                                          | 2.068(6)     | 0.586       | 4.066        |       |
| Te(1)-O(1)                                                                          | 1.848(7)     | 1.417       |              |       |
| Te(2)-F(3)                                                                          | 2.040(6)     | 0.632       |              |       |
| Te(2)-O(3)                                                                          | 1.860(7)     | 1.372       |              |       |
| Te(2)-F(4)                                                                          | 2.030(6)     | 0.649       | 4.066        |       |
| Te(2)-O(4)                                                                          | 1.849(6)     | 1.413       |              |       |
| Ag <sub>3</sub> F <sub>3</sub> (TeF <sub>6</sub> )(TeO <sub>2</sub> ) <sub>12</sub> | Ag(1)-O(2)#1 | 2.559(7)    | 0.130        | 1.000 |
|                                                                                     | Ag(1)-O(2)#2 | 2.559(7)    | 0.130        |       |
|                                                                                     | Ag(1)-O(2)#3 | 2.559(7)    | 0.130        |       |
|                                                                                     | Ag(1)-O(2)   | 2.559(7)    | 0.130        |       |

|  |              |           |       |       |
|--|--------------|-----------|-------|-------|
|  | Ag(1)-O(1)#2 | 2.590(7)  | 0.120 |       |
|  | Ag(1)-O(1)#1 | 2.590(7)  | 0.120 |       |
|  | Ag(1)-O(1)   | 2.590 (7) | 0.120 |       |
|  | Ag(1)-O(1)#3 | 2.590(7)  | 0.120 |       |
|  | Te(1)-O(2)   | 1.827(7)  | 1.500 | 4.078 |
|  | Te(1)-O(2)#4 | 2.107(7)  | 0.704 |       |
|  | Te(1)-O(1)#5 | 2.083(7)  | 0.751 |       |
|  | Te(1)-O(1)   | 1.934(7)  | 1.123 |       |
|  | Te(2)-F(1)   | 1.906(17) | 1.030 | 6.180 |
|  | Te(2)-F(1)#1 | 1.906(17) | 1.030 |       |
|  | Te(2)-F(1)#2 | 1.906(17) | 1.030 |       |
|  | Te(2)-F(1)#3 | 1.906(17) | 1.030 |       |
|  | Te(2)-F(1)#4 | 1.906(17) | 1.030 |       |
|  | Te(2)-F(1)#5 | 1.906(17) | 1.030 |       |

Symmetry transformations used to generate equivalent atoms:

For AgTeO<sub>2</sub>F:

#1 1-X,1/2+Y,1/2-Z; #2 +X,3/2-Y,1/2+Z; #3 +X,3/2-Y,-1/2+Z; #4 +X,1/2-Y,-1/2+Z

For Ag<sub>2</sub>(TeO<sub>2</sub>F<sub>2</sub>):

#1 1/2-X,-1/2+Y,+Z; #2 1-X,-1/2+Y,1/2-Z; #3 +X,3/2-Y,-1/2+Z; #4 1-X,1/2+Y,1/2-Z; #5 1-X,2-Y,1-Z; #6 1-X,1-Y,1-Z

For Ag<sub>3</sub>F<sub>3</sub>(TeF<sub>6</sub>)(TeO<sub>2</sub>)<sub>12</sub>:

#1 -X,-1-Y,+Z; #2 +X,-1-Y,-2-Z; #3 -X,+Y,-2-Z; #4 1/2+Y,-1/2-X,-3/2-Z; #5 -1/2-X,-3/2-Z,-1/2+Y

**Table S3.** The bond angles (deg.) for AgTeO<sub>2</sub>F, Ag<sub>2</sub>(TeO<sub>2</sub>F<sub>2</sub>) and Ag<sub>3</sub>F<sub>3</sub>(TeF<sub>6</sub>)(TeO<sub>2</sub>)<sub>12</sub> (c)

| <b>AgTeO<sub>2</sub>F</b>                                                         |            |                      |            |
|-----------------------------------------------------------------------------------|------------|----------------------|------------|
| O(1)-Ag(1)-O(1)#3                                                                 | 91.10(14)  | F(1)-Te(1)-O(2)#6    | 175.15(16) |
| O(1)-Ag(1)-O(1)#1                                                                 | 127.55(13) | O(1)-Te(1)-F1        | 92.56(17)  |
| O(1)#1-Ag(1)-O(1)#3                                                               | 86.33(16)  | O(1)-Te(1)-O(2)      | 93.4(2)    |
| O(1)#1-Ag(1)-O(1)#4                                                               | 110.02(15) | O(1)-Te(1)-O(2)#6    | 87.94(19)  |
| O(1)-Ag(1)-O(2)#4                                                                 | 118.06(15) | O(2)-Te(1)-F(1)      | 87.81(18)  |
| O(2)4-Ag(1)-O(1)#3                                                                | 115.40(15) | O(2)-Te1-O(2)#6      | 87.34(10)  |
| <b>Ag<sub>2</sub>(TeO<sub>2</sub>F<sub>2</sub>)</b>                               |            |                      |            |
| O(1)-Ag(1)-O(1)#1                                                                 | 124.7(3)   | F(1)#2-Ag(2)-O(3)#5  | 87.4(2)    |
| O(1)-Ag(1)-F(1)#2                                                                 | 104.1(2)   | O(2)#2-Ag(2)-F(1)#2  | 66.4(2)    |
| O(1)#1-Ag(1)-F(3)#2                                                               | 122.6(2)   | O(2)-Ag(2)-F(1)#2    | 140.6(2)   |
| O(1)-Ag(1)-O(4)#2                                                                 | 139.0(3)   | O(2)-Ag(2)-O(2)#2    | 134.48(19) |
| O(4)#2-Ag(1)-O(1)#1                                                               | 90.8(2)    | O(2)#2-Ag(2)-O(3)#5  | 86.9(2)    |
| O(4)#2-Ag(1)-F(3)#2                                                               | 63.9(2)    | O(2)-Ag(2)-O(3)#5    | 121.4(2)   |
| O(2)-Ag(3)-O(3)#6                                                                 | 89.1(2)    | O(1)#2-Ag(4)-F(4)    | 104.9(2)   |
| O(2)-Ag(3)-O(3)                                                                   | 164.5(2)   | O(3)#7-Ag(4)-O(1)#2  | 109.7(2)   |
| O(2)-Ag(3)-F(4)#7                                                                 | 83.2(2)    | O(3)#7-Ag(4)-F(4)    | 87.2(2)    |
| O(3)-Ag(3)-O(3)#6                                                                 | 106.46(19) | O(3)#7-Ag(4)-O(4)    | 143.8(2)   |
| O(3)-Ag(3)-F(4)#7                                                                 | 87.4(2)    | O(4)-Ag(4)-O(1)#2    | 98.8(2)    |
| O(3)#6-Ag(3)-F(4)#7                                                               | 127.9(2)   | O(4)-Ag(4)-F(4)      | 63.7(2)    |
| O(1)-Te(1)-F(1)                                                                   | 86.3(3)    | O(3)-Te(2)-F(3)      | 86.9(3)    |
| O(1)-Te(1)-F(2)                                                                   | 87.5(3)    | O(3)-Te(2)-F(4)      | 88.6(3)    |
| O(1)-Te(1)-O(2)                                                                   | 98.9(3)    | F(4)-Te(2)-F(3)      | 171.2(2)   |
| F(2)-Te(1)-F(1)                                                                   | 169.5(2)   | O(4)-Te(2)-F(3)      | 86.7(3)    |
| O(2)-Te(1)-F(1)                                                                   | 83.7(3)    | O(4)-Te(2)-O(3)      | 98.6(3)    |
| O(2)-Te(1)-F(2)                                                                   | 88.9(3)    | O(4)-Te(2)-F(4)      | 86.5(3)    |
| <b>Ag<sub>3</sub>F<sub>3</sub>(TeF<sub>6</sub>)(TeO<sub>2</sub>)<sub>12</sub></b> |            |                      |            |
| O(1)-Ag(1)-O(1)#2                                                                 | 124.7(3)   | O(1)-Te(1)-O(1)#5    | 90.7(5)    |
| O(1)#1-Ag(1)-O(1)#3                                                               | 124.7(3)   | O(1)-Te(1)-O(2)#6    | 84.6(3)    |
| O(1)-Ag(1)-O(1) #3                                                                | 129.3(3)   | O(1)#5-Te(1)-O(2)#6  | 175.1(3)   |
| O(1)#2-Ag(1)-O(1)#3                                                               | 78.3(4)    | O(2)-Te(1)-O(1)#5    | 88.0(3)    |
| O(2)-Ag(1)-O(1)#3                                                                 | 77.7(2)    | O(2)-Te(1)-O(1)      | 90.7(3)    |
| O(2)#2-Ag(1)-O(1)#2                                                               | 62.6(2)    | O(2)-Te(1)-O(2)#6    | 90.5(5)    |
| O(2)#2-Ag(1)-O(1)#1                                                               | 77.7(2)    | O(1)-Te(1)-O(1)#5    | 90.7(5)    |
| O(2)#3-Ag(1)-O(1)#1                                                               | 151.1(2)   | O(1)-Te(1)-O(2)#6    | 84.6(3)    |
| O(2)#2-Ag(1)-O(1)                                                                 | 151.1(2)   | O(1)#5-Te(1)-O(2)#6  | 175.1(3)   |
| O(2)#1-Ag(1)-O(1)#1                                                               | 62.6(2)    | O(2)-Te(1)-O(1)#5    | 88.0(3)    |
| O(2)#1-Ag(1)-O(1)#2                                                               | 77.7(2)    | O(2)-Te(1)-O(1)      | 90.7(3)    |
| O(2)#3-Ag(1)-O(1)                                                                 | 77.7(2)    | O(2)-Te(1)-O(2)#6    | 90.5(5)    |
| O(2)#3-Ag(1)-O(1)#3                                                               | 62.6(2)    | F(1)#8-Te(2)-F(1)#9  | 90.000(4)  |
| O(2)#3-Ag(1)-O(1)#2                                                               | 78.3(3)    | F(1)#10-Te(2)-F(1)#8 | 180        |
| O(2)#2-Ag(1)-O(1)#3                                                               | 78.3(2)    | F(1)#11-Te(2)-F(1)#9 | 90.000(1)  |
| O(2)#1-Ag(1)-O(1)#3                                                               | 151.1(2)   | F(1)-Te(2)-F(1)#12   | 90.000(2)  |
| O(2)-Ag(1)-O(1)#1                                                                 | 78.3(3)    | F(1)-Te(2)-F(1)#9    | 90.000(2)  |
| O(2)#1-Ag(1)-O(1)                                                                 | 78.3(2)    | F(1)-Te(2)-F(1)#11   | 180        |

|                     |          |                       |           |
|---------------------|----------|-----------------------|-----------|
| O(2)-Ag(1)-O(1)#2   | 151.1(2) | F(1)#12-Te(2)-F(1)#11 | 90.000(4) |
| O(2)-Ag(1)-O(1)     | 62.6(2)  | F(1)#10-Te(2)-F(1)#9  | 90.000(3) |
| O(2)#3-Ag(1)-O(2)#1 | 126.7(3) | F(1)-Te(2)-F(1)#8     | 90.000(8) |
| O(2)#1-Ag(1)-O(2)#2 | 76.5(3)  | F(1)#12-Te(2)-F(1)#9  | 180       |
| O(2)#3-Ag(1)-O(2)#2 | 129.4(3) | F(1)#10-Te(2)-F(1)    | 90.000(3) |
| O(2)#1-Ag(1)-O(2)   | 129.4(3) | F(1)#10-Te(2)-F(1)#11 | 90.000(7) |
| O(2)#2-Ag(1)-O(2)   | 126.7(3) | F(1)#10-Te(2)-F(1)#12 | 90.000(3) |
| O(2)#3-Ag(1)-O(2)   | 76.5(4)  | F(1)#8-Te(2)-F(1)#11  | 90.000(4) |
|                     |          | F(1)#12-Te(2)-F(1)#8  | 90        |

---

Symmetry transformations used to generate equivalent atoms:

For AgTeO<sub>2</sub>F:

#1 1-X,1/2+Y,1/2-Z; #2 1-X,2-Y,-Z; #3 +X,3/2-Y,1/2+Z; #4 +X,3/2-Y,-1/2+Z; #5 1-X,-1/2+Y,1/2-Z; #6 +X,1/2-Y,-1/2+Z; #7 +X,1/2-Y,1/2+Z

For Ag<sub>2</sub>TeO<sub>2</sub>F<sub>2</sub>:

#1 1/2-X,-1/2+Y,+Z; #2 1-X,-1/2+Y,1/2-Z; #3 1-X,1/2+Y,1/2-Z; #4 1/2-X,1/2+Y,+Z; #5 +X,3/2-Y,-1/2+Z; #6 1-X,2-Y,1-Z; #7 1-X,1-Y,1-Z

For Ag<sub>3</sub>F<sub>3</sub>(TeF<sub>6</sub>)(TeO<sub>2</sub>)<sub>12</sub>:

#1 +X,-1-Y,-2-Z; #2 -X,+Y,-2-Z; #3 -X,-1-Y,+Z; #4 -1/2-X,1/2+Z,-3/2-Y; #5 -1/2-X,-3/2-Z,-1/2+Y; #6 1/2+Y,-1/2-X,-3/2-Z; #7 -1/2-Y,-1/2+X,-3/2-Z; #8 1+Y,+Z,-1+X; #9 1+Z,-1+X,+Y; #10 -1-Y,-2-Z,-1+X; #11 -X,-2-Y,+Z; #12 -1-Z,-1+X,-2-Y

**Table S4.** State energies (eV) of the highest valence band (H-VB) and the lowest conduction band (H-CB) of AgTeO<sub>2</sub>F and Ag<sub>2</sub>(TeO<sub>2</sub>F<sub>2</sub>).

| <b>Compound</b>                                     | <b>K-point</b>          | <b>H-VB</b> | <b>L-CB</b> |
|-----------------------------------------------------|-------------------------|-------------|-------------|
| <b>AgTeO<sub>2</sub>F</b>                           | Z(0.000, 0.000, 0.500)  | -0.00778    | 3.21377     |
|                                                     | G(0.000, 0.000, 0.000)  | -0.12896    | 2.28288     |
|                                                     | Y(0.000, 0.500, 0.000)  | -0.2482     | 3.09269     |
|                                                     | A(-0.500,0.500, 0.000)  | -0.24597    | 2.95289     |
|                                                     | B(-0.500, 0.000, 0.000) | -0.20134    | 2.28718     |
|                                                     | D(-0.500,0.000, 0.500)  | -0.00981    | 3.1081      |
|                                                     | E(-0.500, 0.500, 0.500) | -0.0261     | 3.50632     |
|                                                     | C(0.000, 0.500, 0.500)  | -0.01677    | 3.48323     |
| <b>Ag<sub>2</sub>(TeO<sub>2</sub>F<sub>2</sub>)</b> | G(0.000, 0.000, 0.000)  | -0.05844    | 1.63577     |
|                                                     | Z(0.000, 0.000, 0.500)  | -0.07541    | 1.79551     |
|                                                     | T(-0.500, 0.000, 0.500) | -0.1152     | 1.90439     |
|                                                     | Y(-0.500, 0.000, 0.000) | -0.06226    | 1.78815     |
|                                                     | S(-0.500, 0.500, 0.000) | -0.02199    | 2.53857     |
|                                                     | X(0.000, 0.500, 0.000)  | 0           | 2.41571     |
|                                                     | U(0.000, 0.500, 0.500)  | -0.0204     | 2.53774     |
|                                                     | R(-0.500, 0.500, 0.500) | -0.039      | 2.60582     |



## Computational Methods.

Single-crystal structural data of  $\text{AgTeO}_2\text{F}$  and  $\text{Ag}_2(\text{TeO}_2\text{F}_2)$  were directly used for the theoretical calculations. The electronic structures and optical properties were calculated by using a plane-wave pseudopotentials method within density functional theory (DFT) implemented in the total energy code of CASTEP [1]. For the exchange-correlation functional, we chose Perdew–Burke–Ernzerhof (PBE) in the generalized gradient approximation (GGA) [2]. The interactions between the ionic cores and the electrons were described by the norm-conserving pseudopotential [3]. The following valence-electron configurations were considered in the computation: O- $2s^22p^4$ , F- $2s^22p^5$ , Te- $5s^25p^4$ , and Ag- $4s^24p^64d^{10}5s^1$ . The number of plane waves included in the basis sets was determined by a cutoff energy of 850 eV. Monkhorst–Pack k-point sampling of  $3 \times 4 \times 5$  and  $2 \times 4 \times 2$  were used to perform numerical integration of the Brillouin zone for the two compounds.

## References

- [1] M. D. Segall, P. J. D. Lindan, M. J. Probert, C. J. Pickard, P. J. Hasnip, S. J. Clark and M. C. J. Payne, First-principles simulation: ideas, illustrations and the CASTEP code, *Phys-Condens Mat.*, 2002, **14**, 2717.
- [2] V. Milman, B. Winkler, J. A. White, C. J. Pickard, M. C. Payne, E. V. Akhmatkaya and R. H. Nobes, Electronic structure, properties, and phase stability of inorganic crystals: A pseudopotential plane-wave study, *Int. J. Quantum. Chem.*, 2000, **77**, 895-910.
- [3] J. P. Perdew, K. Burke and M. Ernzerhof, Generalized Gradient Approximation Made Simple, *Phys. Rev. Lett.*, 1996, **77**, 3865.
